# Supplementary material for: Reactivity of a carbonyl moiety in organotin(iv) compounds: novel Pd(ii) and Cu(ii) complexes supported by organotin(iv) ligands
Source: Royal Society of Chemistry journal article supplement (doi:10.1039/d0nj06016j), 2021-01-01
Supplement: d0nj06016j1.pdf [file d0nj06016j1.pdf]

## Electronic Supplementary Information

### **Reactivity of a carbonyl moiety in organotin(IV) compounds. Novel Pd(II) and Cu(II) complexes supported by organotin(IV) ligands**

Adrian-Alexandru Someșan<sup>a</sup>, Cristian Silvestru<sup>a</sup> and Richard A. Varga<sup>a,\*</sup>

<sup>a</sup>Department of Chemistry, Supramolecular Organic and Organometallic Chemistry Centre (SOOMCC), Faculty of Chemistry and Chemical Engineering, Babeș-Bolyai University, 11 Arany Janos, RO-400028, Cluj-Napoca, Romania.

\*Corresponding author

E-mail address: richard.varga@ubbcluj.ro

## Content

|                                                                                                                                                     |     |
|-----------------------------------------------------------------------------------------------------------------------------------------------------|-----|
| Numbering schemes for NMR resonance assignments                                                                                                     | S3  |
| $^1\text{H}$ and $^{13}\text{C}$ NMR spectra of <b>1</b>                                                                                            | S4  |
| $^1\text{H}$ and $^{13}\text{C}$ NMR spectra of <b>2</b>                                                                                            | S5  |
| $^1\text{H}$ and $^{13}\text{C}$ NMR spectra of <b>3</b>                                                                                            | S6  |
| $^1\text{H}$ and $^{13}\text{C}$ NMR spectra of <b>4</b>                                                                                            | S7  |
| $^1\text{H}$ and $^{13}\text{C}$ NMR spectra of <b>5</b>                                                                                            | S8  |
| $^1\text{H}$ and $^{13}\text{C}$ NMR spectra of <b>6</b>                                                                                            | S9  |
| $^{11}\text{B}$ NMR spectra of <b>6</b>                                                                                                             | S10 |
| $^1\text{H}$ and $^{13}\text{C}$ NMR spectra of <b>7</b>                                                                                            | S11 |
| $^{119}\text{Sn}$ NMR stacked spectra of <b>1-7</b>                                                                                                 | S12 |
| X-ray crystal data and structure refinement for compounds <b>1, 2, 4</b> and <b>5</b>                                                               | S13 |
| X-ray crystal data and structure refinement for compounds <b>6-8</b>                                                                                | S14 |
| Molecular structures of the isomers of <b>1</b> and disordered structure of <b>3</b> showing the carbonyl fragment located on three occupancy sites | S15 |
| Molecular structure of the isomers of <b>6</b>                                                                                                      | S16 |
| Molecular structure of <b>7</b>                                                                                                                     | S17 |
| Packing of <b>4</b> , showing the interconnected chains forming a layer                                                                             | S18 |
| Packing of <b>4</b> , showing interconnected layers forming a 3D supramolecular architecture                                                        | S19 |
| Offset $\pi\cdots\pi$ stacking and packing along <i>a</i> axis in the crystal of <b>5</b>                                                           | S20 |
| $\text{CH}\cdots\pi$ interactions and 3D supramolecular architecture in the crystal of <b>6</b>                                                     | S21 |
| Intra- and intermolecular contacts observed in the crystal of <b>8</b>                                                                              | S22 |
| Packing of <b>8</b> , showing the parallel chains                                                                                                   | S23 |
| 3D supramolecular architecture in the crystal of <b>8</b>                                                                                           | S24 |

## Numbering schemes for NMR resonance assignments

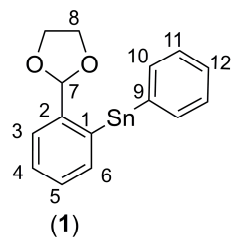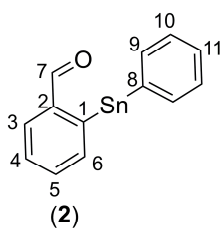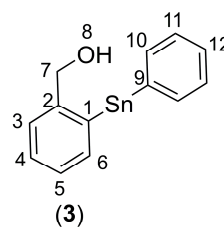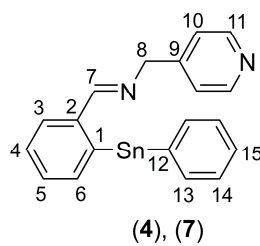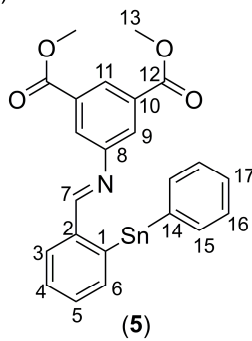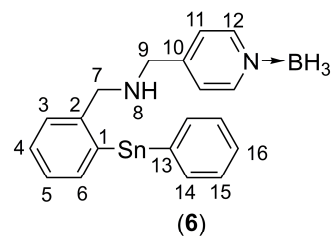

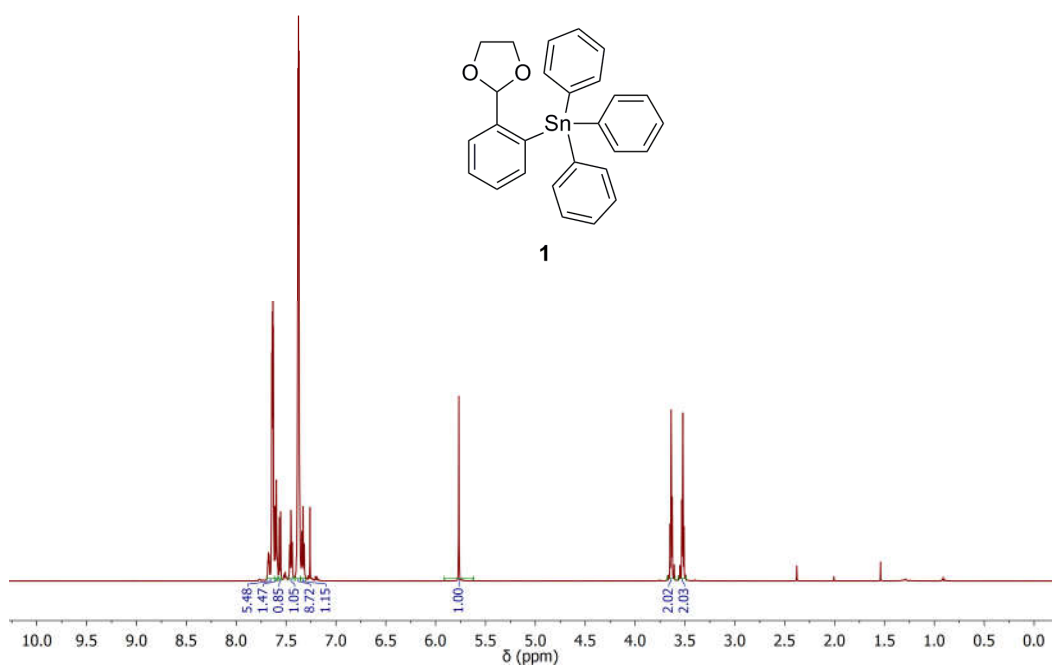

**Figure S1.** <sup>1</sup>H NMR (CDCl<sub>3</sub>, 20 °C) spectrum of [2- $\{(\text{CH}_2\text{O})_2\text{CH}\}$ C<sub>6</sub>H<sub>4</sub>]<sub>3</sub>SnPh<sub>3</sub> (**1**).

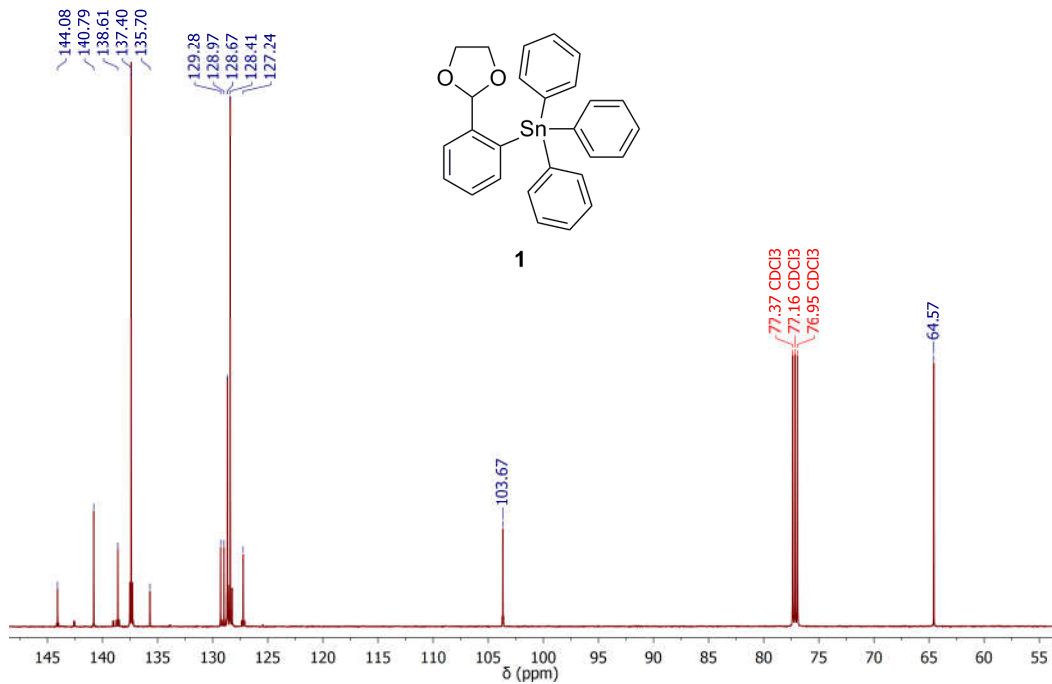

**Figure S2.** <sup>13</sup>C{<sup>1</sup>H} NMR (CDCl<sub>3</sub>, 20 °C) spectrum of [2- $\{(\text{CH}_2\text{O})_2\text{CH}\}$ C<sub>6</sub>H<sub>4</sub>]<sub>3</sub>SnPh<sub>3</sub> (**1**).

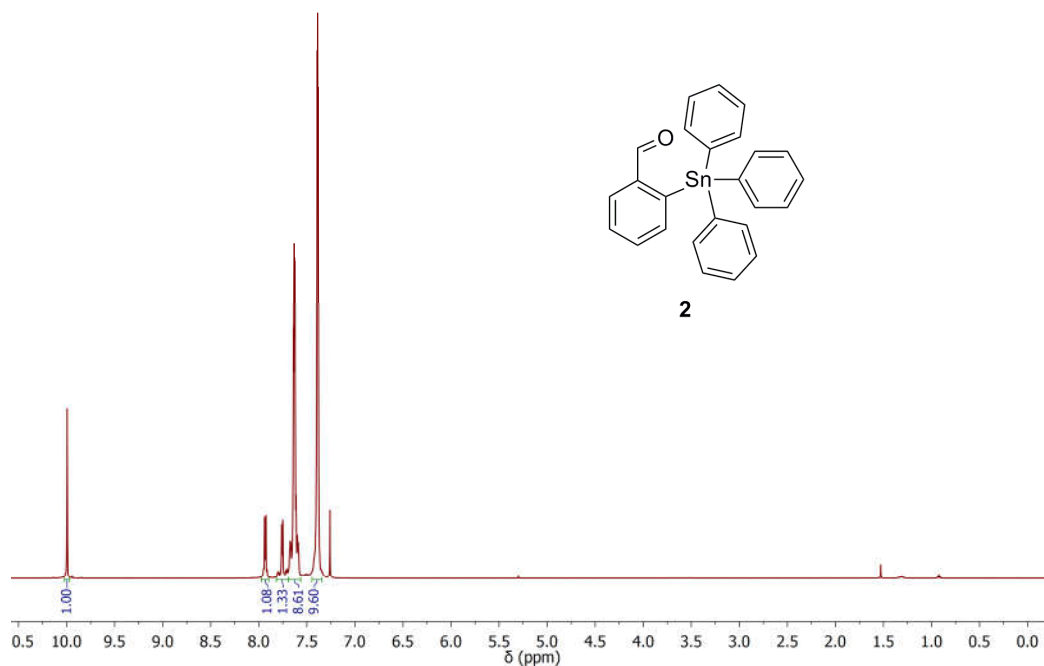

**Figure S3.** <sup>1</sup>H NMR (CDCl<sub>3</sub>, 20 °C) spectrum of [2-(O=CH)C<sub>6</sub>H<sub>4</sub>]SnPh<sub>3</sub> (**2**).

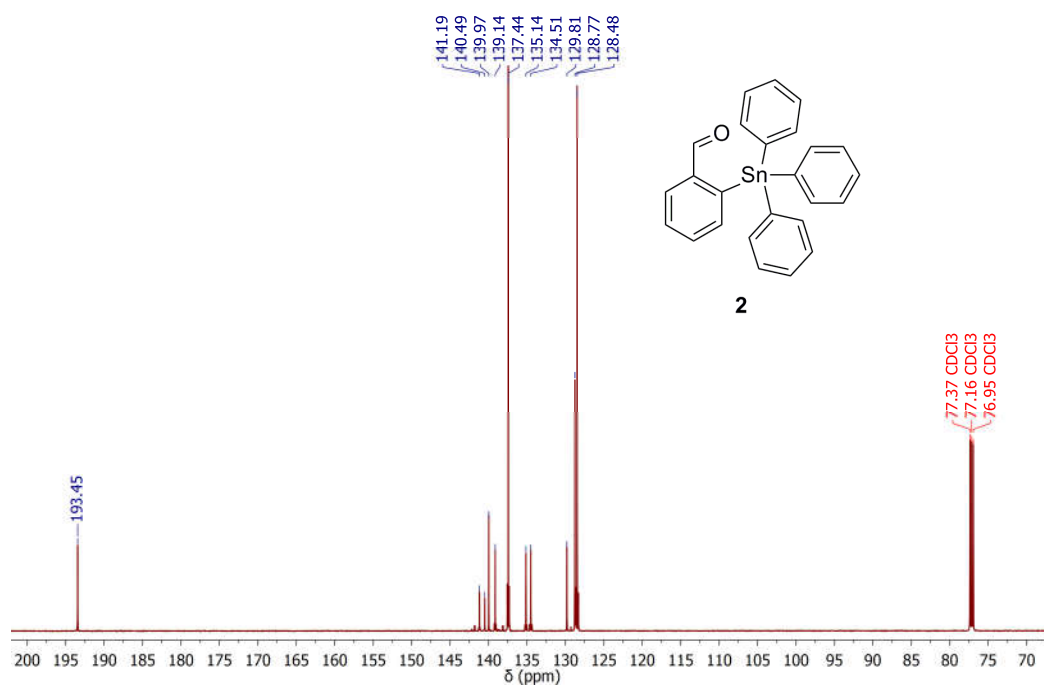

**Figure S4.** <sup>13</sup>C {<sup>1</sup>H} NMR (CDCl<sub>3</sub>, 20 °C) spectrum of [2-(O=CH)C<sub>6</sub>H<sub>4</sub>]SnPh<sub>3</sub> (**2**).

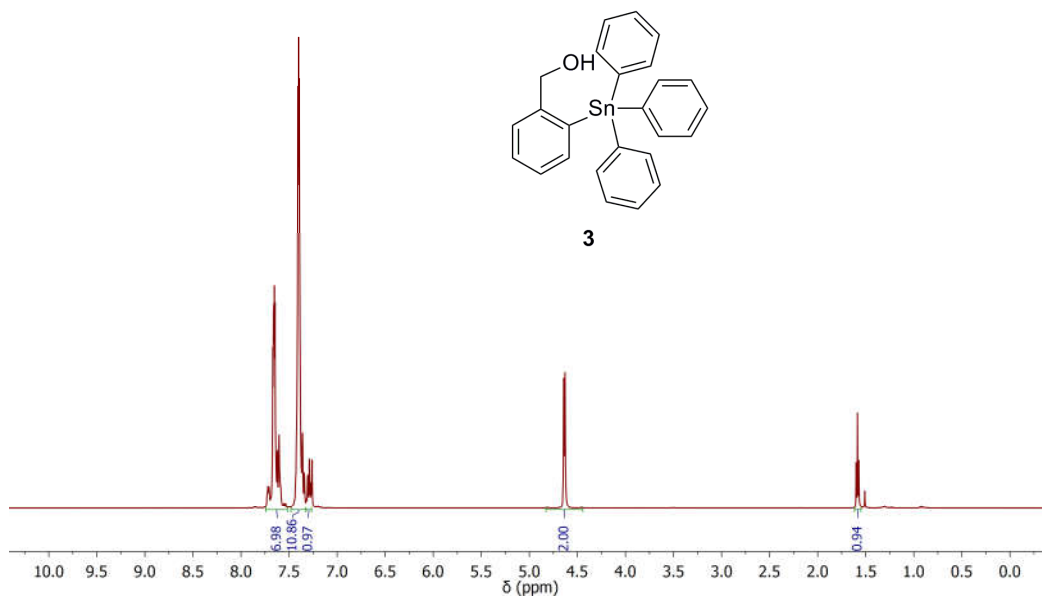

**Figure S5.** <sup>1</sup>H NMR (CDCl<sub>3</sub>, 20 °C) spectrum of [2-(HOCH<sub>2</sub>)C<sub>6</sub>H<sub>4</sub>]SnPh<sub>3</sub> (**3**).

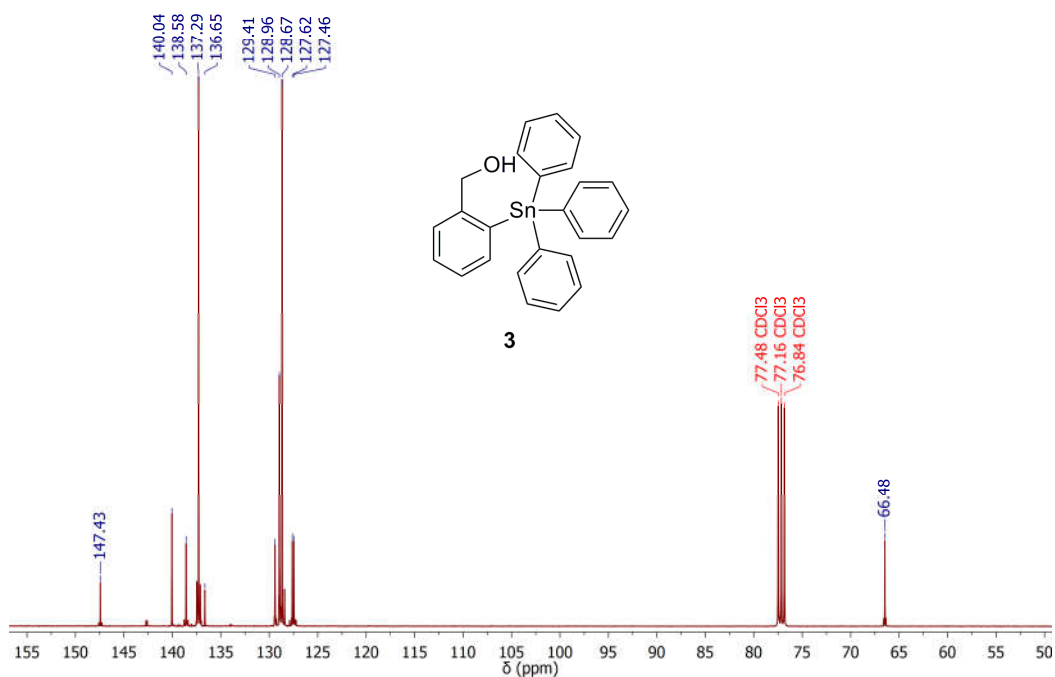

**Figure S6.** <sup>13</sup>C {<sup>1</sup>H} NMR (CDCl<sub>3</sub>, 20 °C) spectrum of [2-(HOCH<sub>2</sub>)C<sub>6</sub>H<sub>4</sub>]SnPh<sub>3</sub> (**3**).

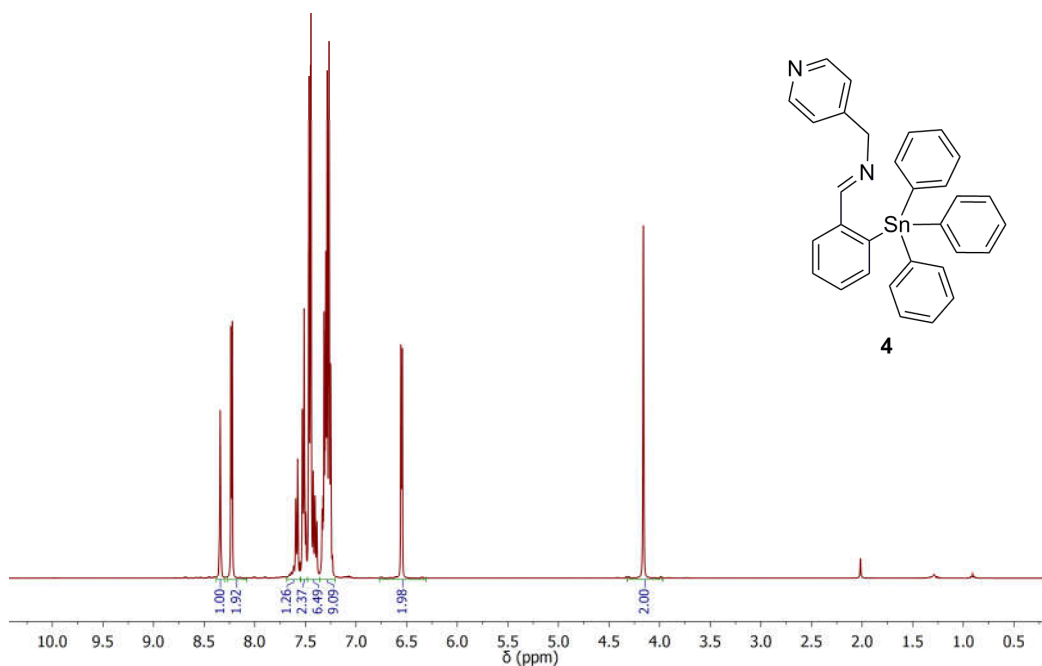

**Figure S7.** <sup>1</sup>H NMR (CDCl<sub>3</sub>, 20 °C) spectrum of [2-(4'-PyCH<sub>2</sub>N=CH)C<sub>6</sub>H<sub>4</sub>]SnPh<sub>3</sub> (**4**).

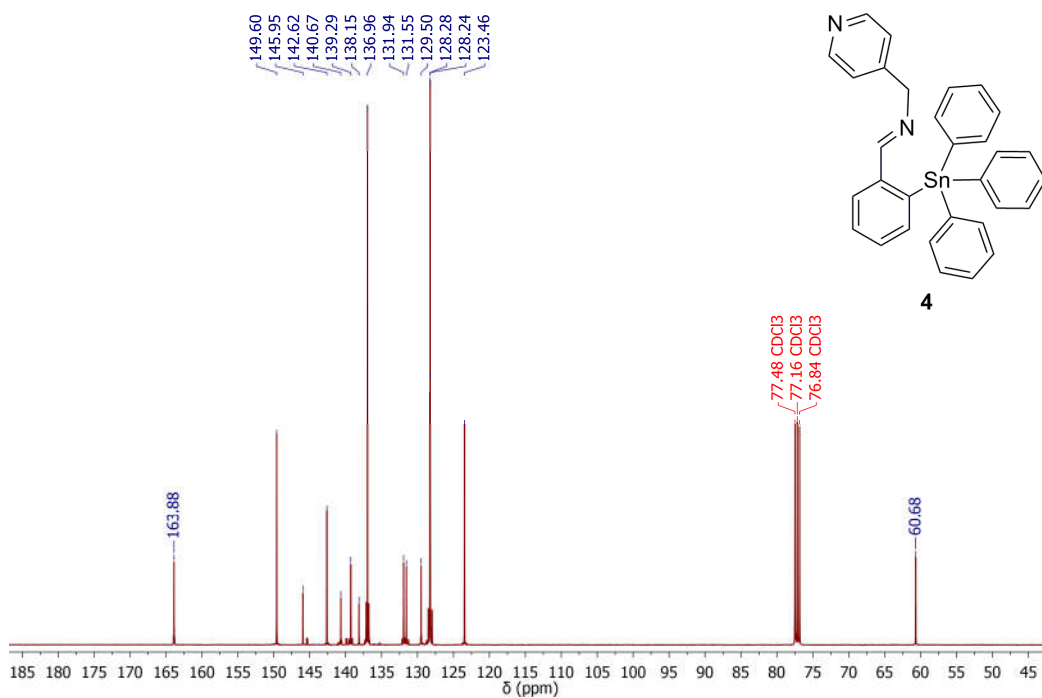

**Figure S8.** <sup>13</sup>C{<sup>1</sup>H} NMR (CDCl<sub>3</sub>, 20 °C) spectrum of [2-(4'-PyCH<sub>2</sub>N=CH)C<sub>6</sub>H<sub>4</sub>]SnPh<sub>3</sub> (**4**).

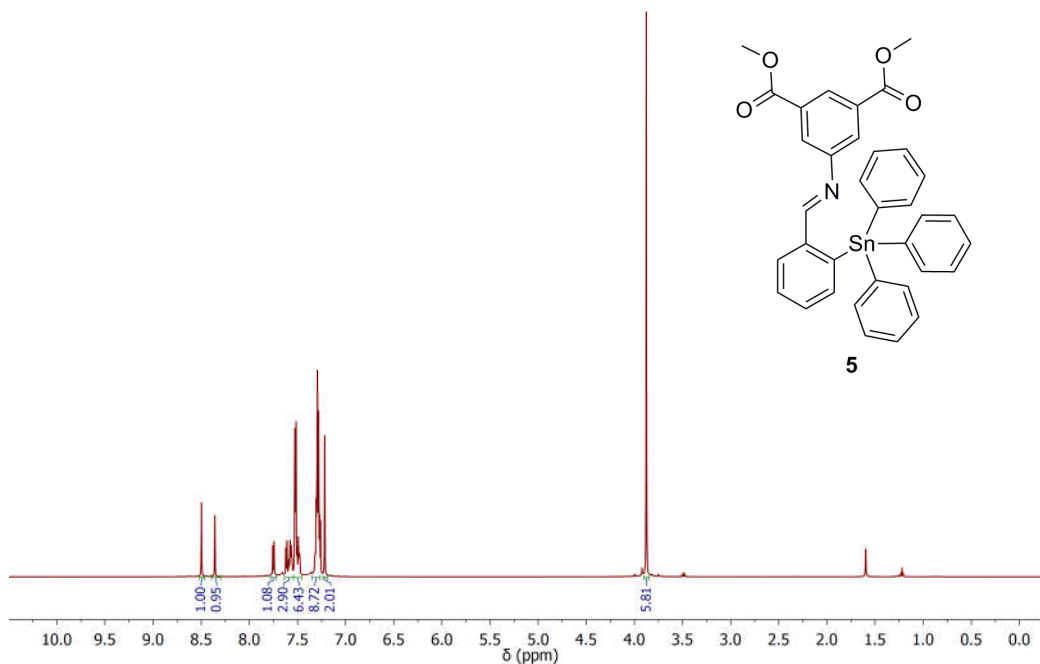

**Figure S9.** <sup>1</sup>H NMR (CDCl<sub>3</sub>, 20 °C) spectrum of [2-(3',5'-(MeOOC)<sub>2</sub>-C<sub>6</sub>H<sub>3</sub>N=CH)C<sub>6</sub>H<sub>4</sub>]SnPh<sub>3</sub> (**5**).

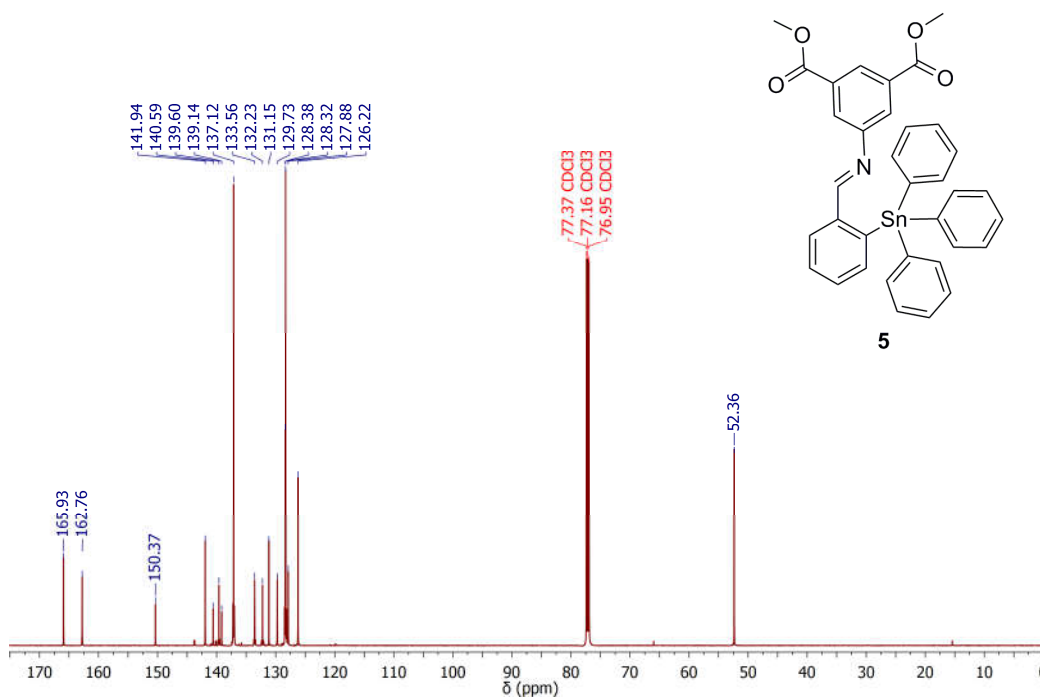

**Figure S10.** <sup>13</sup>C {<sup>1</sup>H} NMR (CDCl<sub>3</sub>, 20 °C) spectrum of [2-(3',5'-(MeOOC)<sub>2</sub>-C<sub>6</sub>H<sub>3</sub>N=CH)C<sub>6</sub>H<sub>4</sub>]SnPh<sub>3</sub> (**5**).



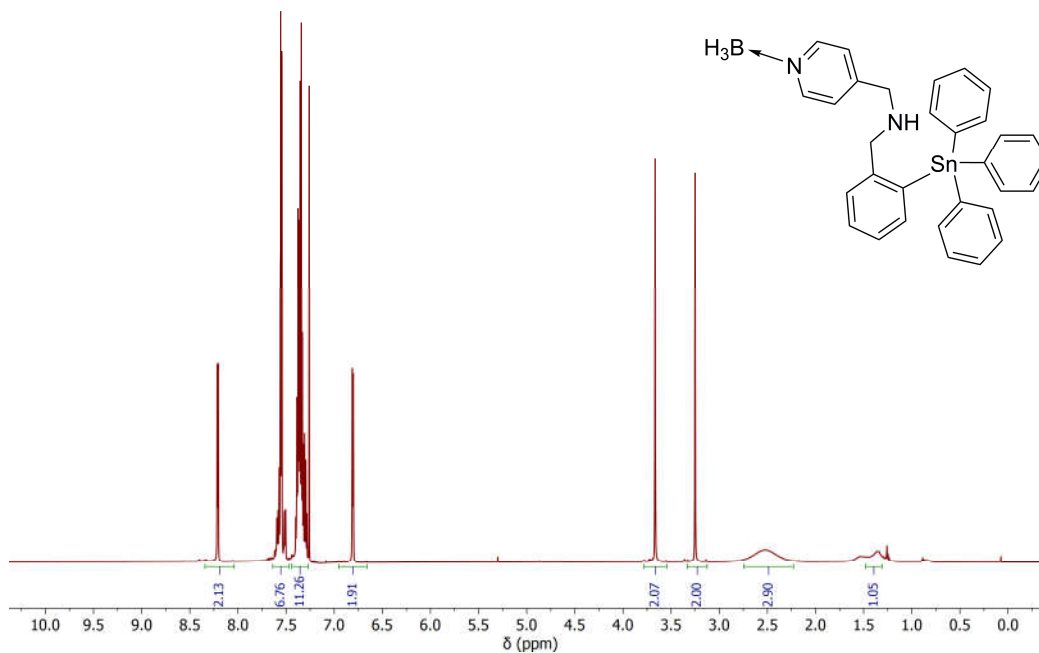

**Figure S11.** <sup>1</sup>H NMR (CDCl<sub>3</sub>, 20 °C) spectrum of [2-(4'-PyCH<sub>2</sub>NH-CH<sub>2</sub>)C<sub>6</sub>H<sub>4</sub>]SnPh<sub>3</sub>·BH<sub>3</sub> (**6**).

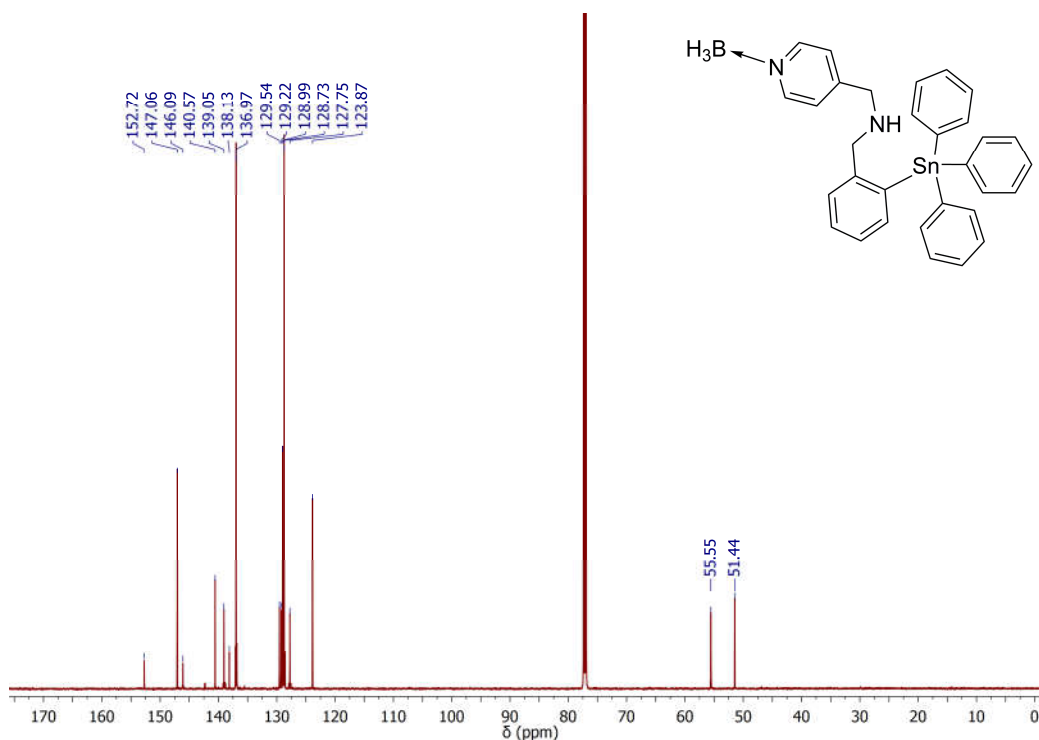

**Figure S12.** <sup>13</sup>C {<sup>1</sup>H} NMR (CDCl<sub>3</sub>, 20 °C) spectrum of [2-(4'-PyCH<sub>2</sub>NH-CH<sub>2</sub>)C<sub>6</sub>H<sub>4</sub>]SnPh<sub>3</sub>·BH<sub>3</sub> (**6**).

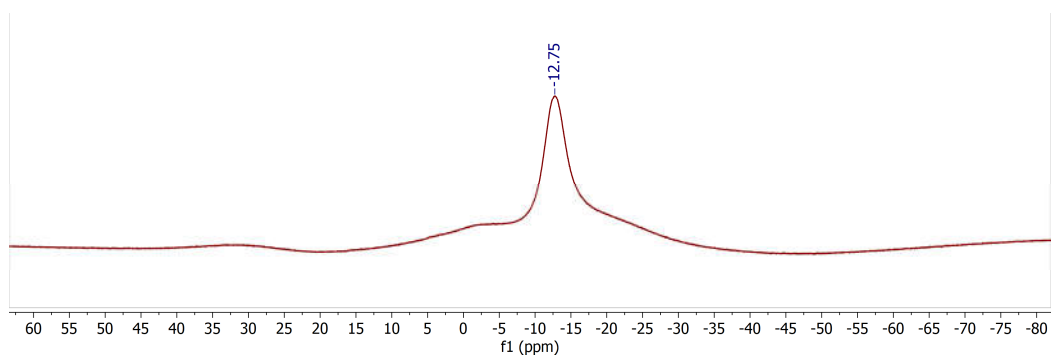

**Figure S13.**  $^{11}\text{B}\{^1\text{H}\}$  NMR ( $\text{CDCl}_3$ , 20 °C) spectrum of [2-(4'-PyCH<sub>2</sub>NH-CH<sub>2</sub>)C<sub>6</sub>H<sub>4</sub>]SnPh<sub>3</sub>·BH<sub>3</sub> (**6**).

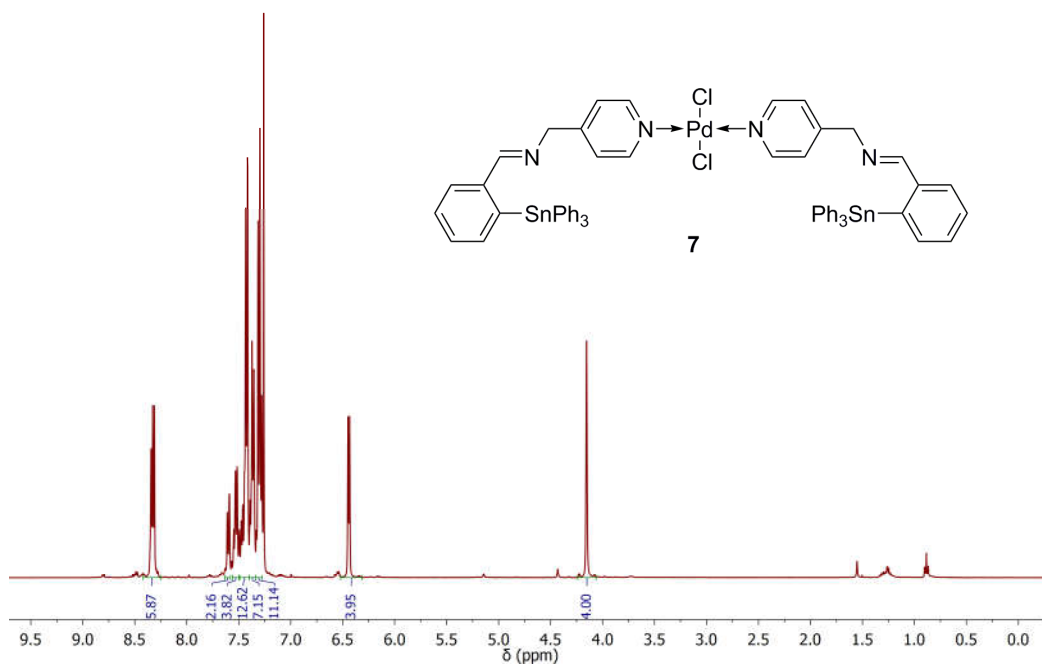

**Figure S14.**  $^1\text{H}$  NMR ( $\text{CDCl}_3$ , 20 °C) spectrum of  $[\{2-(4'\text{-PyCH}_2\text{N=CH})\text{C}_6\text{H}_4\text{SnPh}_3\}_2\text{PdCl}_2]$  (**7**).

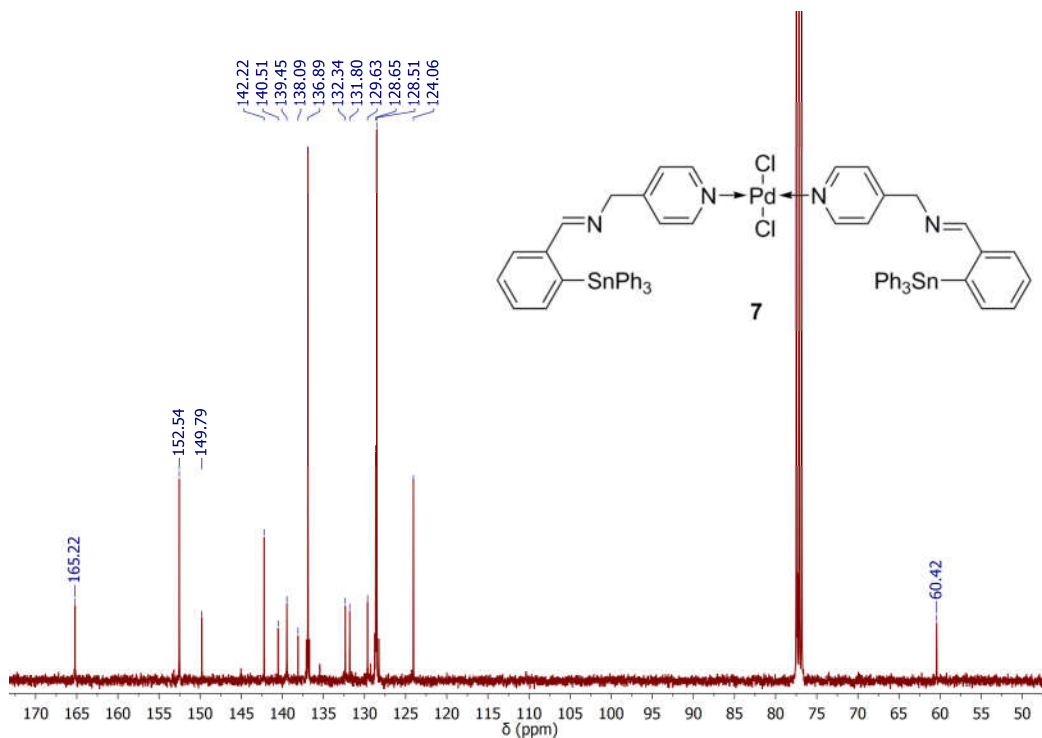

**Figure S15.**  $^{13}\text{C}$  NMR ( $\text{CDCl}_3$ , 20 °C) spectrum of  $[\{2-(4'\text{-PyCH}_2\text{N=CH})\text{C}_6\text{H}_4\text{SnPh}_3\}_2\text{PdCl}_2]$  (**7**).

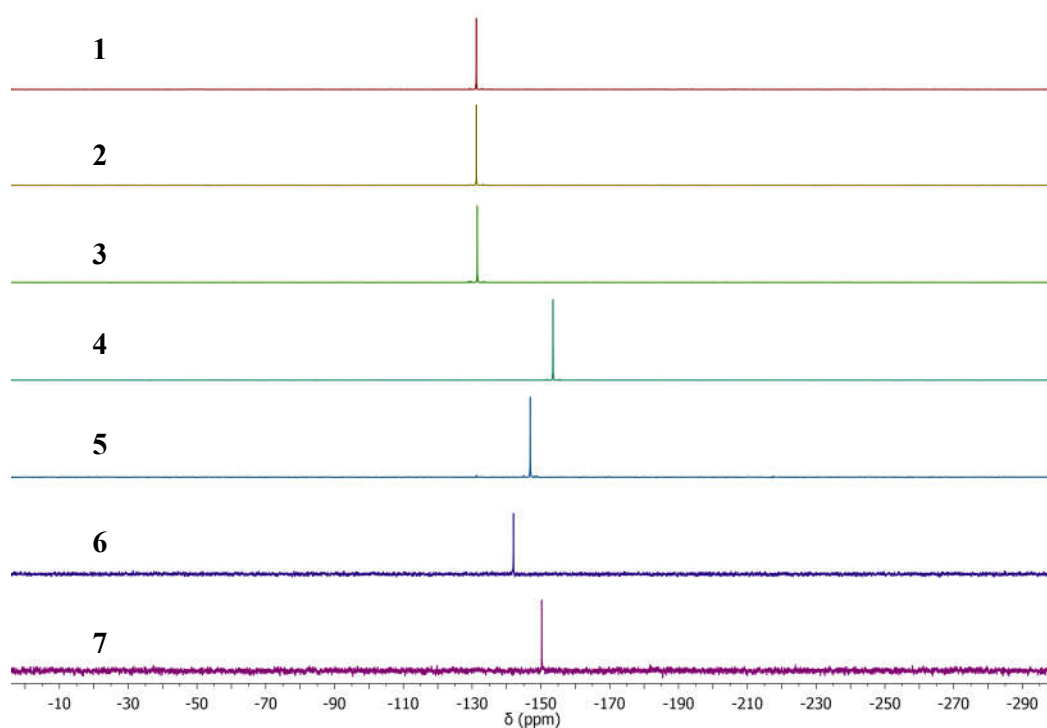

**Figure S16.**  $^{119}\text{Sn}$  NMR ( $\text{CDCl}_3$ , 20  $^\circ\text{C}$ ) stacked spectra of compounds 1-7.

**Table S1.** X-ray crystal data and structure refinement for compounds **1**, **2**, **4** and **5**

|                                                       | <b>1·C<sub>7</sub>H<sub>8</sub></b>                               | <b>2</b>                                                          | <b>4</b>                                                          | <b>5</b>                                                          |
|-------------------------------------------------------|-------------------------------------------------------------------|-------------------------------------------------------------------|-------------------------------------------------------------------|-------------------------------------------------------------------|
| Empirical formula                                     | C <sub>61</sub> H <sub>56</sub> O <sub>4</sub> Sn                 | C <sub>25</sub> H <sub>20</sub> OSn                               | C <sub>31</sub> H <sub>26</sub> N <sub>2</sub> Sn                 | C <sub>35</sub> H <sub>29</sub> NO <sub>4</sub> Sn                |
| Formula weight                                        | 1090.43                                                           | 455.10                                                            | 545.23                                                            | 646.28                                                            |
| Temperature (K)                                       | 150(2)                                                            | 100(2)                                                            | 297(2)                                                            | 150(2)                                                            |
| Crystal system                                        | Monoclinic                                                        | Orthorhombic                                                      | Triclinic                                                         | Triclinic                                                         |
| Space group                                           | <i>P</i> 2 <sub>1</sub> / <i>n</i>                                | <i>Pna</i> 2 <sub>1</sub>                                         | <i>P</i> -1                                                       | <i>P</i> -1                                                       |
| <i>a</i> (Å)                                          | 9.844(2)                                                          | 16.9881(6)                                                        | 9.898(16)                                                         | 10.0636(1)                                                        |
| <i>b</i> (Å)                                          | 18.861(4)                                                         | 15.2425(5)                                                        | 11.551(2)                                                         | 11.6223(2)                                                        |
| <i>c</i> (Å)                                          | 14.068(3)                                                         | 7.7375(2)                                                         | 12.613(3)                                                         | 14.212(2)                                                         |
| $\alpha$ (°)                                          | 90                                                                | 90                                                                | 70.529(4)                                                         | 96.462(2)                                                         |
| $\beta$ (°)                                           | 108.167(4)                                                        | 90                                                                | 80.243(4)                                                         | 97.444(2)                                                         |
| $\gamma$ (°)                                          | 90                                                                | 90                                                                | 67.538(3)                                                         | 113.734(2)                                                        |
| Volume (Å <sup>3</sup> )                              | 2481.8(10)                                                        | 2003.56(11)                                                       | 1255.0(5)                                                         | 1483.8(4)                                                         |
| <i>Z</i>                                              | 2                                                                 | 4                                                                 | 2                                                                 | 2                                                                 |
| <i>D</i> <sub>calc</sub> (g cm <sup>-3</sup> )        | 1.459                                                             | 1.509                                                             | 1.443                                                             | 1.447                                                             |
| Absorption coefficient (mm <sup>-1</sup> )            | 1.055                                                             | 1.286                                                             | 1.039                                                             | 0.900                                                             |
| <i>F</i> (000)                                        | 1108                                                              | 912                                                               | 552                                                               | 656                                                               |
| Crystal size (mm)                                     | 0.29x0.25x0.22                                                    | 0.08x0.08x0.11                                                    | 0.29x0.28x0.26                                                    | 0.23x0.26x0.33                                                    |
| $\theta$ range for data collection (°)                | 1.867 to 25.099                                                   | 2.40 to 28.28                                                     | 1.714 to 24.999                                                   | 1.469 to 24.999                                                   |
| Reflections collected                                 | 24041                                                             | 28944                                                             | 11831                                                             | 14095                                                             |
| Independent reflections                               | 4423                                                              | 4967                                                              | 4367                                                              | 5182                                                              |
|                                                       | [ <i>R</i> <sub>int</sub> = 0.0481]                               | [ <i>R</i> <sub>int</sub> = 0.0333]                               | [ <i>R</i> <sub>int</sub> = 0.0361]                               | [ <i>R</i> <sub>int</sub> = 0.0255]                               |
| Absorption correction                                 | Multi-Scan <sup>1</sup>                                           | Multi-Scan <sup>1</sup>                                           | Multi-Scan <sup>1</sup>                                           | Multi-Scan <sup>1</sup>                                           |
| Data / restraints / parameters                        | 4423 / 123 / 335                                                  | 4967 / 1 / 244                                                    | 4367 / 0 / 307                                                    | 5182 / 0 / 372                                                    |
| Goodness-of-fit on <i>F</i> <sup>2</sup>              | 1.095                                                             | 1.085                                                             | 1.026                                                             | 1.088                                                             |
| Final <i>R</i> indices [ <i>I</i> > 2σ( <i>I</i> )]   | <i>R</i> <sub>I</sub> = 0.0385<br><i>wR</i> <sub>2</sub> = 0.0984 | <i>R</i> <sub>I</sub> = 0.0327<br><i>wR</i> <sub>2</sub> = 0.0857 | <i>R</i> <sub>I</sub> = 0.0324<br><i>wR</i> <sub>2</sub> = 0.0657 | <i>R</i> <sub>I</sub> = 0.0252<br><i>wR</i> <sub>2</sub> = 0.0614 |
| <i>R</i> indices (all data)                           | <i>R</i> <sub>I</sub> = 0.0457<br><i>wR</i> <sub>2</sub> = 0.1031 | <i>R</i> <sub>I</sub> = 0.0370<br><i>wR</i> <sub>2</sub> = 0.0885 | <i>R</i> <sub>I</sub> = 0.0402<br><i>wR</i> <sub>2</sub> = 0.0690 | <i>R</i> <sub>I</sub> = 0.0271<br><i>wR</i> <sub>2</sub> = 0.0623 |
| Largest difference peak and hole (e Å <sup>-3</sup> ) | 1.421 and -0.477                                                  | 1.494 and -0.942                                                  | 0.48 and -0.301                                                   | 0.55 and -0.21                                                    |
| CCDC No.                                              | 2003707                                                           | 2003708                                                           | 2003705                                                           | 2003706                                                           |

G. M. Sheldrick, *SADABS, Program for area detector adsorption correction*, Institute for Inorganic Chemistry, University of Göttingen, Germany, 1996.

**Table S2.** X-ray crystal data and structure refinement for compounds **6-8**.

|                                                       | <b>6</b>                                                          | <b>7</b>                                                                         | <b>8</b>                                                                           |
|-------------------------------------------------------|-------------------------------------------------------------------|----------------------------------------------------------------------------------|------------------------------------------------------------------------------------|
| Empirical formula                                     | C <sub>31</sub> H <sub>31</sub> BN <sub>2</sub> Sn                | C <sub>62</sub> H <sub>52</sub> Cl <sub>2</sub> N <sub>4</sub> PdSn <sub>2</sub> | C <sub>72</sub> H <sub>54</sub> CuF <sub>12</sub> N <sub>4</sub> O <sub>4</sub> Sn |
| Formula weight                                        | 561.08                                                            | 1267.75                                                                          | 1568.11                                                                            |
| Temperature (K)                                       | 297(2)                                                            | 100(2)                                                                           | 100(2)                                                                             |
| Crystal system                                        | Monoclinic                                                        | Monoclinic                                                                       | Monoclinic                                                                         |
| Space group                                           | Cc                                                                | <i>P</i> 2 <sub>1</sub> / <i>n</i>                                               | <i>C</i> 2/ <i>c</i>                                                               |
| <i>a</i> (Å)                                          | 14.6278(17)                                                       | 8.2544(7)                                                                        | 27.3118(9)                                                                         |
| <i>b</i> (Å)                                          | 13.3165(15)                                                       | 17.3898(14)                                                                      | 12.8432(5)                                                                         |
| <i>c</i> (Å)                                          | 14.9311(17)                                                       | 18.3621(16)                                                                      | 20.0980(7)                                                                         |
| $\alpha$ (°)                                          | 90                                                                | 90                                                                               | 90                                                                                 |
| $\beta$ (°)                                           | 111.563(2)                                                        | 95.750(3)                                                                        | 111.2470(1)                                                                        |
| $\gamma$ (°)                                          | 90                                                                | 90                                                                               | 90                                                                                 |
| Volume (Å <sup>3</sup> )                              | 2704.9(5)                                                         | 2622.5(4)                                                                        | 6570.6(4)                                                                          |
| <i>Z</i>                                              | 4                                                                 | 2                                                                                | 4                                                                                  |
| <i>D</i> <sub>calc</sub> (g cm <sup>-3</sup> )        | 1.378                                                             | 1.605                                                                            | 1.585                                                                              |
| Absorption coefficient (mm <sup>-1</sup> )            | 0.966                                                             | 1.431                                                                            | 1.162                                                                              |
| <i>F</i> (000)                                        | 1144                                                              | 1264                                                                             | 3132                                                                               |
| Crystal size (mm)                                     | 0.20x0.25x0.29                                                    | 0.05x0.05x0.07                                                                   | 0.06x0.09x0.14                                                                     |
| $\theta$ range for data collection (°)                | 2.140 to 25.099                                                   | 2.23 to 29.48                                                                    | 2.18 to 28.30                                                                      |
| Reflections collected                                 | 12809                                                             | 75729                                                                            | 111572                                                                             |
| Independent reflections                               | 4780                                                              | 7288                                                                             | 8170                                                                               |
|                                                       | [ <i>R</i> <sub>int</sub> = 0.0477]                               | [ <i>R</i> <sub>int</sub> = 0.0651]                                              | [ <i>R</i> <sub>int</sub> = 0.0366]                                                |
| Absorption correction                                 | Multi-Scan <sup>1</sup>                                           | Multi-Scan <sup>1</sup>                                                          | Multi-Scan <sup>1</sup>                                                            |
| Data / restraints / parameters                        | 4780 / 9 / 332                                                    | 7288 / 2510 / 651                                                                | 8170 / 360 / 487                                                                   |
| Goodness-of-fit on <i>F</i> <sup>2</sup>              | 1.036                                                             | 1.006                                                                            | 1.030                                                                              |
| Final <i>R</i> indices [ <i>I</i> > 2σ( <i>I</i> )]   | <i>R</i> <sub>I</sub> = 0.0389<br><i>wR</i> <sub>2</sub> = 0.0904 | <i>R</i> <sub>I</sub> = 0.0477<br><i>wR</i> <sub>2</sub> = 0.1071                | <i>R</i> <sub>I</sub> = 0.0298<br><i>wR</i> <sub>2</sub> = 0.0702                  |
| <i>R</i> indices (all data)                           | <i>R</i> <sub>I</sub> = 0.0416<br><i>wR</i> <sub>2</sub> = 0.0919 | <i>R</i> <sub>I</sub> = 0.0951<br><i>wR</i> <sub>2</sub> = 0.1335                | <i>R</i> <sub>I</sub> = 0.0346<br><i>wR</i> <sub>2</sub> = 0.0735                  |
| Largest difference peak and hole (e Å <sup>-3</sup> ) | 1.068 and -0.317                                                  | 0.566 and -0.758                                                                 | 2.241 and -1.327                                                                   |
| CCDC No.                                              | 2003704                                                           | 2003709                                                                          | 2003710                                                                            |

<sup>1</sup>G. M. Sheldrick, *SADABS, Program for area detector adsorption correction*, Institute for Inorganic Chemistry, University of Göttingen, Germany, 1996.

**[2- $\{(\text{CH}_2\text{O})_2\text{CH}\}\text{C}_6\text{H}_4\text{]\text{SnPh}_3$  (**1**)**

- the crystal contains a 1:1 mixture of  $p\text{S}_{\text{O}(1)}\text{-S}_{\text{C}(7)}\text{-1}$  and  $p\text{R}_{\text{O}(1)}\text{-R}_{\text{C}(7)}\text{-1}$

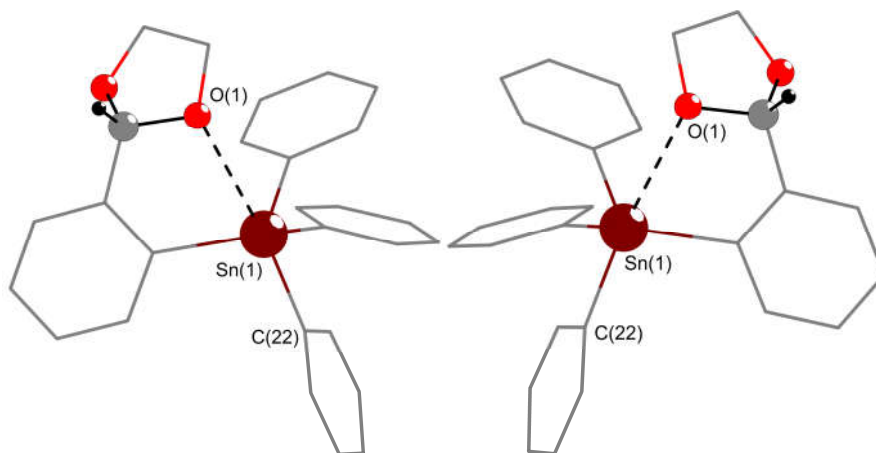

**Figure S17.** Molecular structure of  $p\text{S}_{\text{O}(1)}\text{-S}_{\text{C}(7)}\text{-1}$  isomer (*left*) and  $p\text{R}_{\text{O}(1)}\text{-R}_{\text{C}(7)}\text{-1}$  isomer (*right*) in the crystal of **1** (only methyne hydrogen is shown).

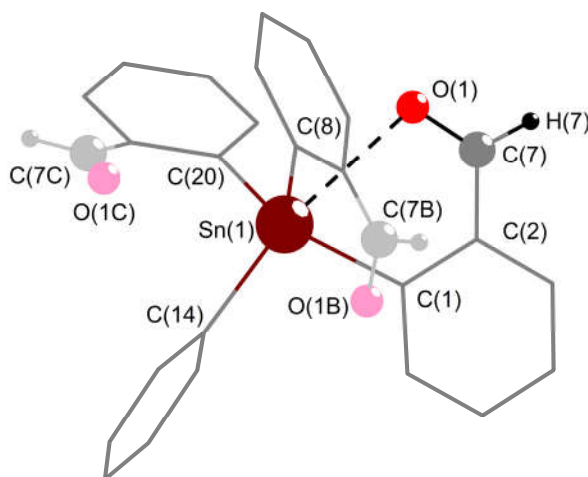

**Figure S18.** Molecular structure of **3** showing the carbonyl fragment located on three different phenyl rings with a site having preponderant occupancy [0.69 C(7)] over the others [0.18 C(7B) and 0.13 C(7C)] (only carbonyl hydrogen atoms are shown).

**[2-(4-PyCH<sub>2</sub>NH-CH<sub>2</sub>)C<sub>6</sub>H<sub>4</sub>][SnPh<sub>3</sub>·BH<sub>3</sub> (**6**)**

- the crystal contains a 1:1 mixture of *pS<sub>N(1)</sub>-S<sub>N(1)</sub>*-**6** and *pR<sub>N(1)</sub>-R<sub>N(1)</sub>*-**6**

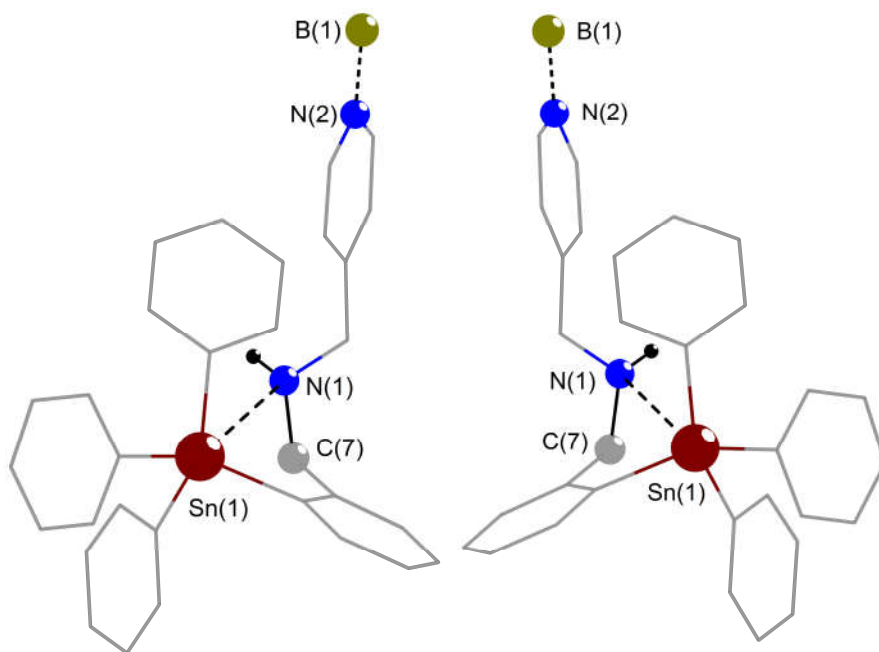

**Figure S19.** Molecular structure of *pS<sub>N(1)</sub>-S<sub>N(1)</sub>*-**6** isomer (*left*) and *pR<sub>N(1)</sub>-R<sub>N(1)</sub>*-**6** isomer (*right*) in the crystal of **6** (only amine hydrogen is shown).



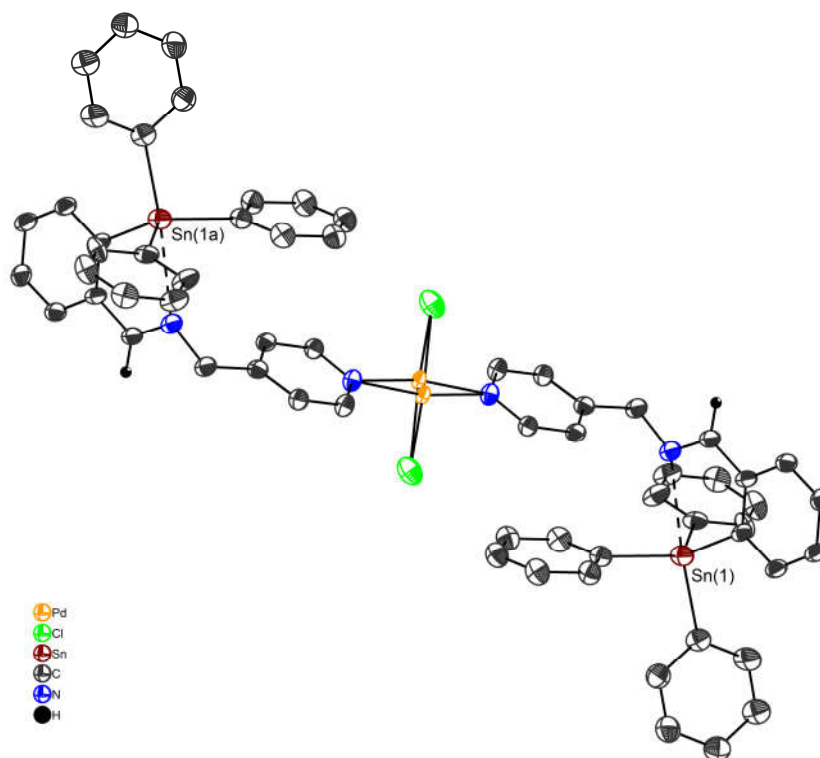

**Figure S20.** ORTEP representation at 30% probability of **7**, displaying only the major occupancy site of the molecule (68%) (only imine hydrogen atoms are shown). Selected interatomic distances (Å) and bond angles (°): Sn(1)–C distances (Å): 2.192(10), 2.194(11), 2.157(7), 2.154(8), Sn(1)···N distance 2.737(12) (Å), axial angle N–Sn(1)–C = 174.4(4)°.

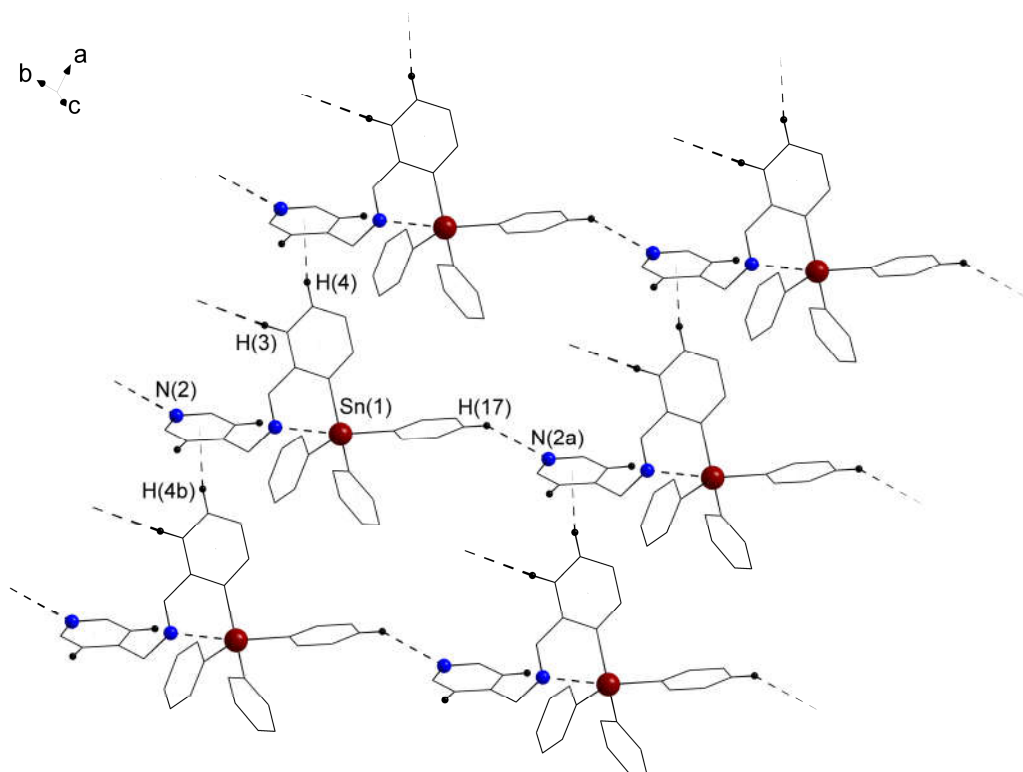

**Figure S21.** Packing of the molecules in the crystal of **4**, showing the interconnected chains forming a layer (only hydrogen atoms involved in intermolecular contacts are shown). [Symmetry equivalents atom ( $l+x, -l+y, l+z$ ), ( $-l+x, y, z$ ) are given by “a”, “b”, respectively].

|                           |                                           |        |                                                                   |
|---------------------------|-------------------------------------------|--------|-------------------------------------------------------------------|
| - intermolecular distance | H(17)···N(2a)                             | 2.66 Å | $\sum r_{\text{vdW}}(\text{N,H})$ 2.75 Å<br>$\gamma = 12.2^\circ$ |
|                           | C(4b)–H(4b)···Ph <sub>centroid</sub> {Py} | 2.89 Å |                                                                   |

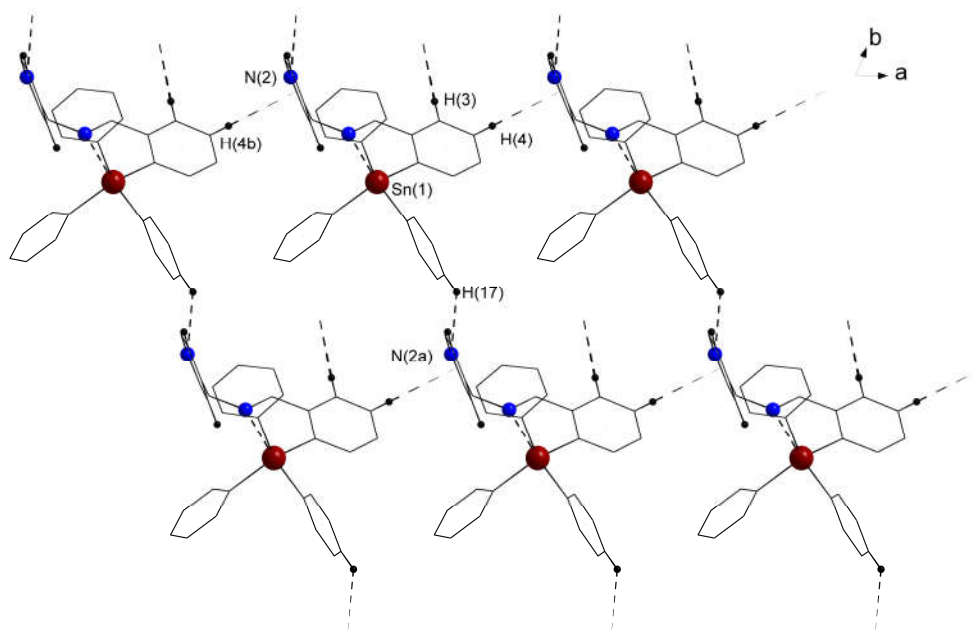

**Figure S22.** Viewing along *c* axis of the packing of molecules in the crystal of **4**, showing the interconnected chains forming a layer (only hydrogen atoms involved in intermolecular contacts are shown). [Symmetry equivalents atom ( $I+x, -I+y, I+z$ ), ( $-I+x, y, z$ ) are given by “a”, “b”, respectively].

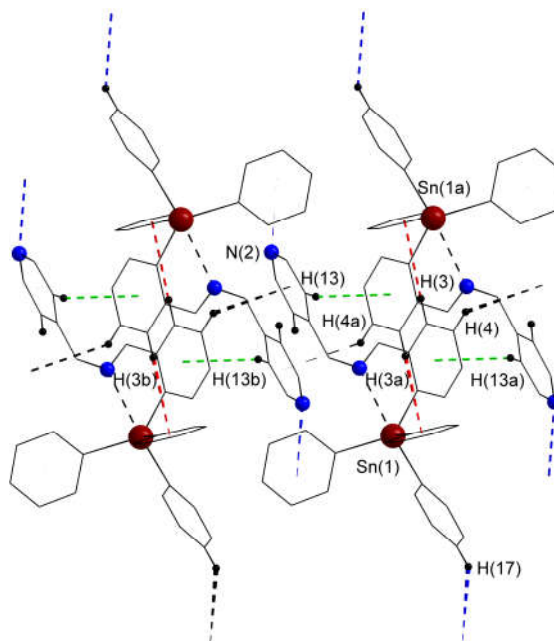

**Figure S23.** Packing of the molecules in the crystal **4**, showing the interconnected layers forming 3D supramolecular architecture (only hydrogen atoms involved in intermolecular contacts are shown) [symmetry equivalent atoms ( $I-x, I-y, -z$ ), ( $-x, I-y, -z$ ) are given by “a” and “b” respectively].

|                                                          |        |                       |
|----------------------------------------------------------|--------|-----------------------|
| $C(3)-H(3) \cdots Ph_{\text{centroid}}\{C(26)-C(31)\}$   | 2.85 Å | $\gamma = 6.4^\circ$  |
| $C(13b)-H(13b) \cdots Ph_{\text{centroid}}\{C(1)-C(6)\}$ | 2.95 Å | $\gamma = 18.2^\circ$ |

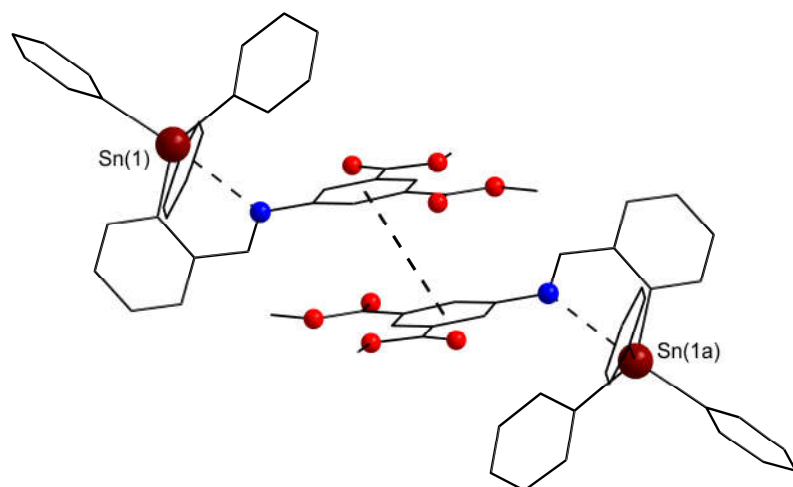

**Figure S24.** Offset  $\pi\cdots\pi$  stacking in the crystal of **5** (hydrogen atoms are omitted for clarity) [symmetry equivalent ( $2-x$ ,  $1-y$ ,  $2-z$ ) is corresponding to “a”].

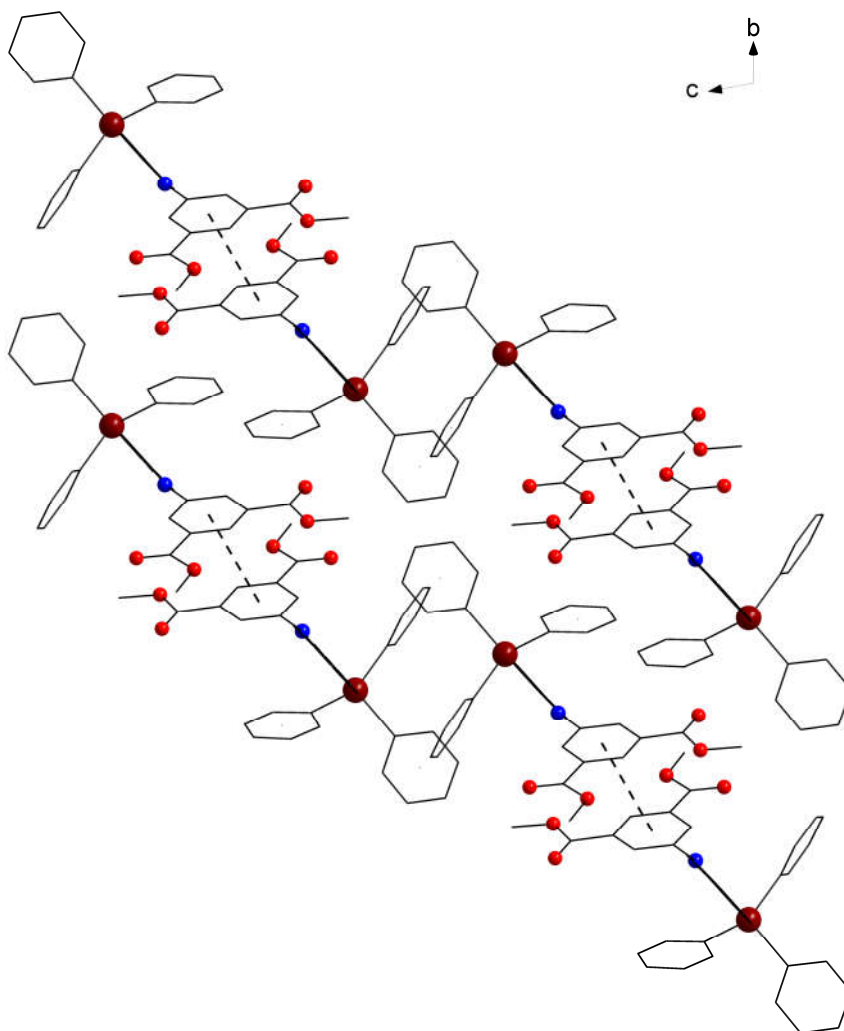

**Figure S25.** View along  $a$  axis of the crystal packing of **5** (hydrogen atoms are omitted for clarity).

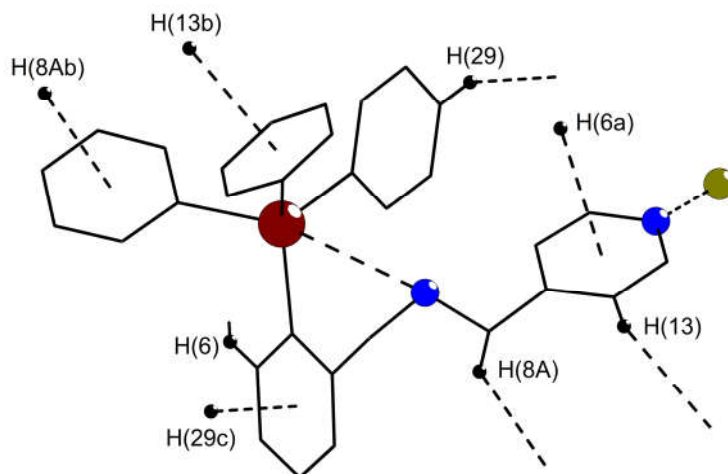

**Figure S26.** CH $\cdots\pi$  interactions in the crystal of **6** (only hydrogen atoms involved in intermolecular contacts are shown) [symmetry equivalent atoms ( $0.5+x$ ,  $0.5-y$ ,  $0.5+z$ ), ( $-0.5+x$ ,  $0.5+y$ ,  $z$ ) and ( $-0.5+x$ ,  $-0.5+y$ ,  $z$ ) are given by “a”, “b” and “c”, respectively].

Intermolecular CH $\cdots\pi$  interactions

|                                                           |        |                       |
|-----------------------------------------------------------|--------|-----------------------|
| C(6)–H(6) $\cdots$ Ph <sub>centroid</sub> {Py}            | 3.08 Å | $\gamma = 9.0^\circ$  |
| C(8)–H(8A) $\cdots$ Ph <sub>centroid</sub> {C(14)–C(19)}  | 3.06 Å | $\gamma = 18.9^\circ$ |
| C(13)–H(13) $\cdots$ Ph <sub>centroid</sub> {C(20)–C(25)} | 2.79 Å | $\gamma = 5.3^\circ$  |
| C(29)–H(29) $\cdots$ Ph <sub>centroid</sub> {C(1)–C(6)}   | 2.83 Å | $\gamma = 18.3^\circ$ |

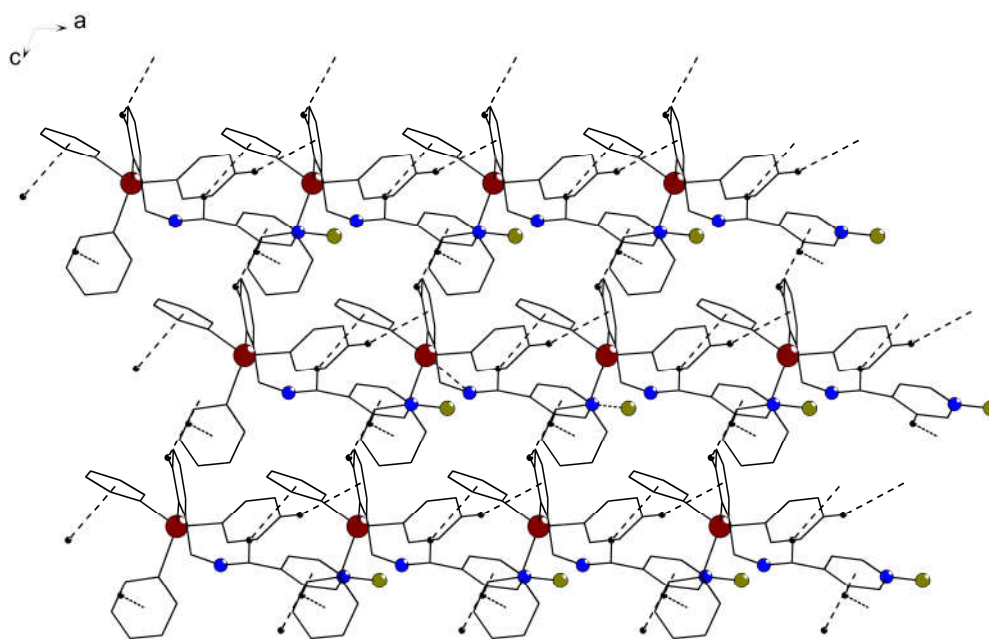

**Figure S27.** View along  $b$  axis of the 3D supramolecular architecture in the crystal packing of **6** (only hydrogen atoms involved in intermolecular contacts are shown).

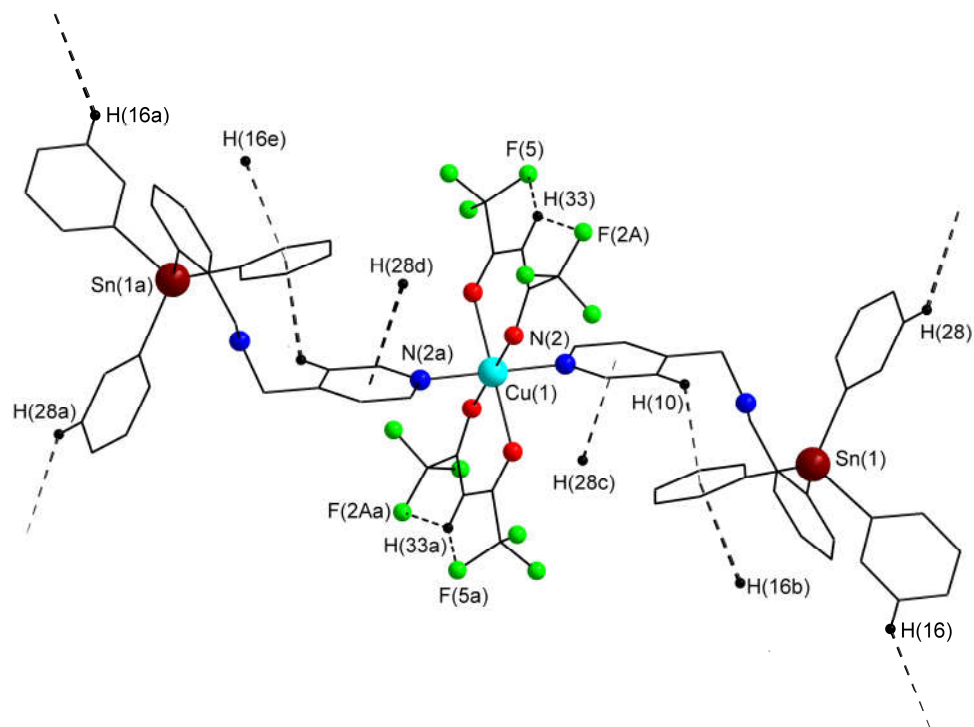

**Figure S28.** CH $\cdots\pi$  interactions in the crystal of **8** (only hydrogen atoms involved in intermolecular contacts are shown) [symmetry equivalent atoms ( $1-x, 1-y, 1-z$ ), ( $1.5-x, 0.5-y, 2-z$ ), ( $1.5-x, -0.5+y, 1.5-z$ ), ( $-0.5+x, 1.5-y, -0.5+z$ ) and ( $-0.5+x, 0.5+y, -1+z$ ) are given by “a”, “b”, “c”, “d” and “e”, respectively; only the major occupancy site of the disordered CF<sub>3</sub> fragment is depicted].

Intramolecular H $\cdots$ F interactions

|             |        |                                                            |
|-------------|--------|------------------------------------------------------------|
| F(5)–(H33)  | 2.50 Å | $\sum r_{\text{cov}}(\text{F}, \text{H}) = 0.88 \text{ Å}$ |
| F(2A)–(H33) | 2.29 Å | $\sum r_{\text{vdW}}(\text{F}, \text{H}) = 2.55 \text{ Å}$ |

Intramolecular CH $\cdots\pi$  interactions

|                                                           |        |                       |
|-----------------------------------------------------------|--------|-----------------------|
| C(10)–H(10) $\cdots$ Ph <sub>centroid</sub> {C(20)–C(25)} | 2.77 Å | $\gamma = 10.4^\circ$ |
|-----------------------------------------------------------|--------|-----------------------|

Intermolecular CH $\cdots\pi$  interactions

|                                                           |        |                       |
|-----------------------------------------------------------|--------|-----------------------|
| C(16)–H(16) $\cdots$ Ph <sub>centroid</sub> {C(20)–C(25)} | 2.88 Å | $\gamma = 5.3^\circ$  |
| C(28)–H(28) $\cdots$ Ph <sub>centroid</sub> {Py}          | 2.96 Å | $\gamma = 14.1^\circ$ |

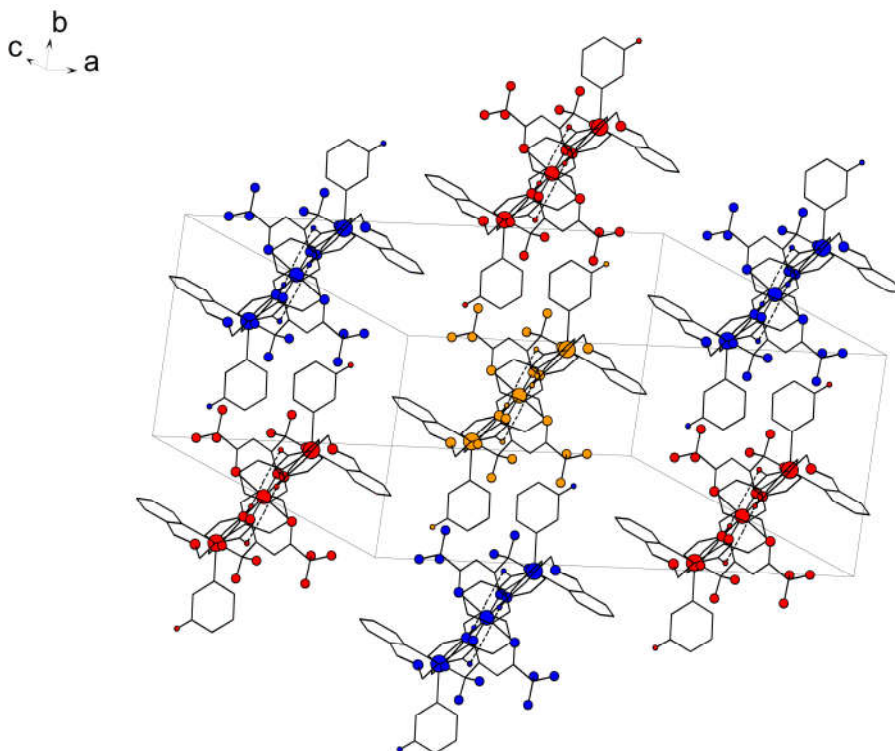

**Figure S29.** View of the parallel chain-like polymers in the crystal of **8** generated by the  $\text{CH}\cdots\pi$  interaction  $\text{C}(16)\text{--H}(16)\cdots\text{Ph}_{\text{centroid}}\{\text{C}(20)\text{--C}(25)\}$  (only hydrogen atoms involved in intermolecular contacts are shown).

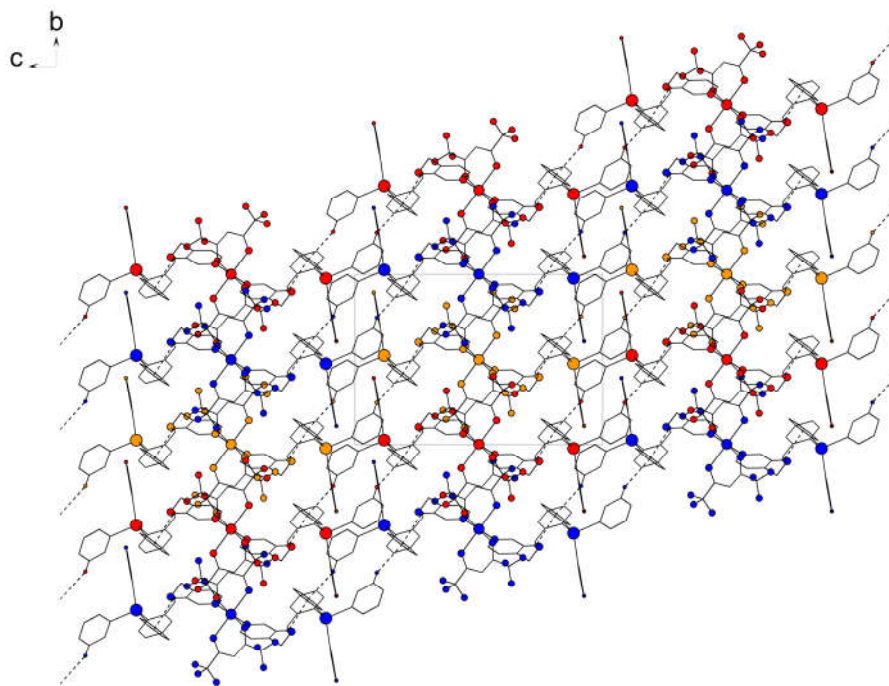

**Figure S30.** View along  $a$  axis of the parallel chain-like polymers in the crystal of **8** generated by the  $\text{CH}\cdots\pi$  interaction  $\text{C}(16)\text{--H}(16)\cdots\text{Ph}_{\text{centroid}}\{\text{C}(20)\text{--C}(25)\}$  (only hydrogen atoms involved in intermolecular contacts are shown).



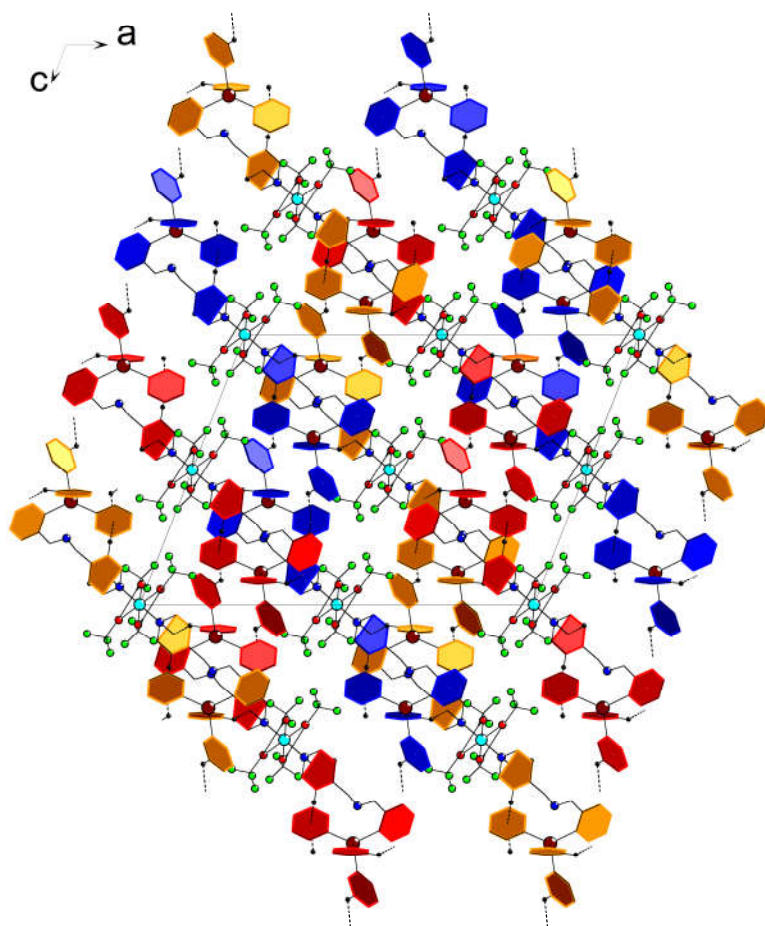

**Figure S31.** View along  $b$  axis of the 3D supramolecular architecture in the crystal of **8**. Interconnected chain-like polymers are highlighted in different colours (only hydrogen atoms involved in intermolecular contacts are shown).
